# Supplementary material for: The Japan Public Health Center-based Prospective Study for the Next Generation (JPHC-NEXT): Study Design and Participants
Source: PubMed Central journal article supplement (PMC6908844; doi:10.2188/jea.je20180182), 2020-01-05
Supplement: je-30-046-s001.pdf [file je-30-046-s001.pdf]

**eTable 1.** Baseline characteristics in subjects aged 40–59 in JPHC and JPHC-NEXT

|                                       | Male             |                  | Female           |                  |
|---------------------------------------|------------------|------------------|------------------|------------------|
|                                       | JPHC-NEXT        | JPHC             | JPHC-NEXT        | JPHC             |
| Year of birth, median (min-max)       | 1963 (1951–1977) | 1942 (1930–1954) | 1963 (1951–1977) | 1942 (1930–1954) |
| Current smoker, %                     | 42.6             | 54.5             | 11.5             | 8.3              |
| Regular drinker,<br>1–2 times/week, % | 66.0             | 70.3             | 30.7             | 16.0             |
| Height, mean (SD)                     | 170.2 (6.1)      | 164.8 (6.2)      | 157.0 (5.8)      | 152.6 (5.5)      |
| Weight, mean (SD)                     | 69.9 (12.1)      | 64.1 (9.0)       | 55.7 (10.5)      | 54.3 (7.8)       |
| Body mass index, mean (SD)            | 24.2 (21.2)      | 23.6 (3.0)       | 23.0 (30.0)      | 23.3 (3.3)       |
| Age at menarche, mean (SD)            | -                | -                | 12.8 (2.2)       | 14.3 (1.8)       |

JPHC, Japan Public Health Center-based Prospective Study; JPHC-NEXT, Japan Public Health Center-based Prospective Study for the Next Generation; SD, standard deviation.
